# Supplementary material for: Synthesis of Na-doped ZnO hollow spheres with improved photocatalytic activity for hydrogen production
Source: Royal Society of Chemistry journal article supplement (doi:10.1039/c6dt02155g), 2016-01-01
Supplement: c6dt02155g1.pdf [file c6dt02155g1.pdf]

## Synthesis of Na doped ZnO Hollow Spheres with Improving Photocatalytic Activity for Hydrogen Production

Zhiwei Wu<sup>a</sup>, Yaguang Li<sup>a\*</sup>, Linjie Gao<sup>a</sup>, Shufang Wang<sup>a</sup> and Guangsheng Fu<sup>a\*</sup>

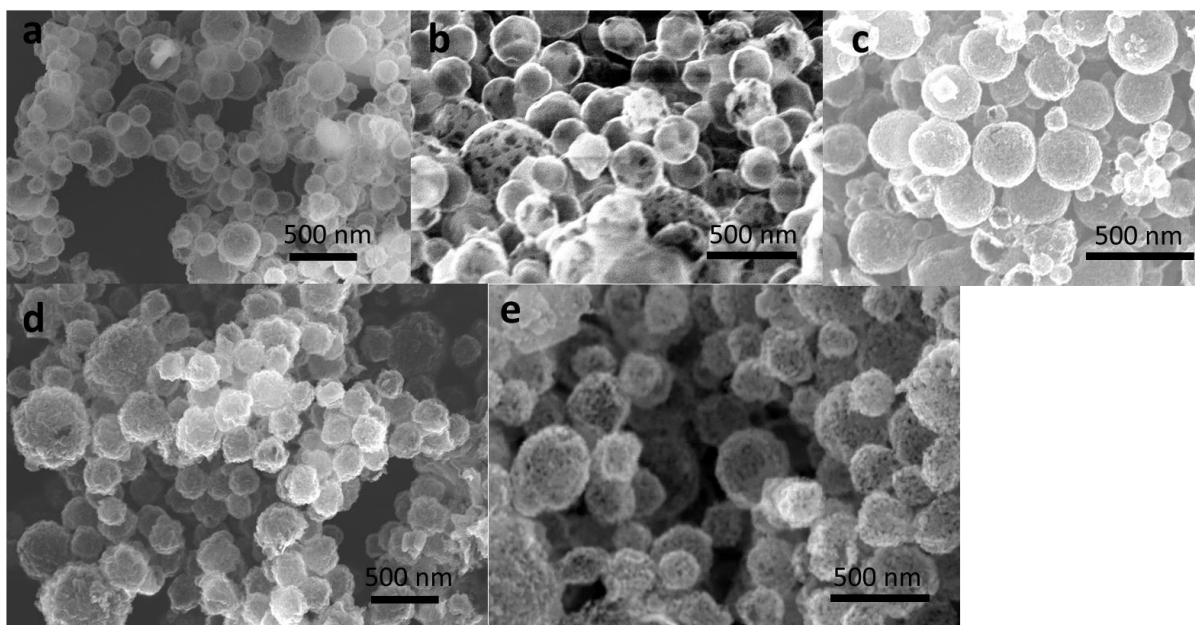

**Figure S1.** (a)-(e) were the SEM images of the pure Na doped ZnO hollow spheres with 0, 0.2, 0.7, 2 and 4 at% Na doping concentration, respectively.

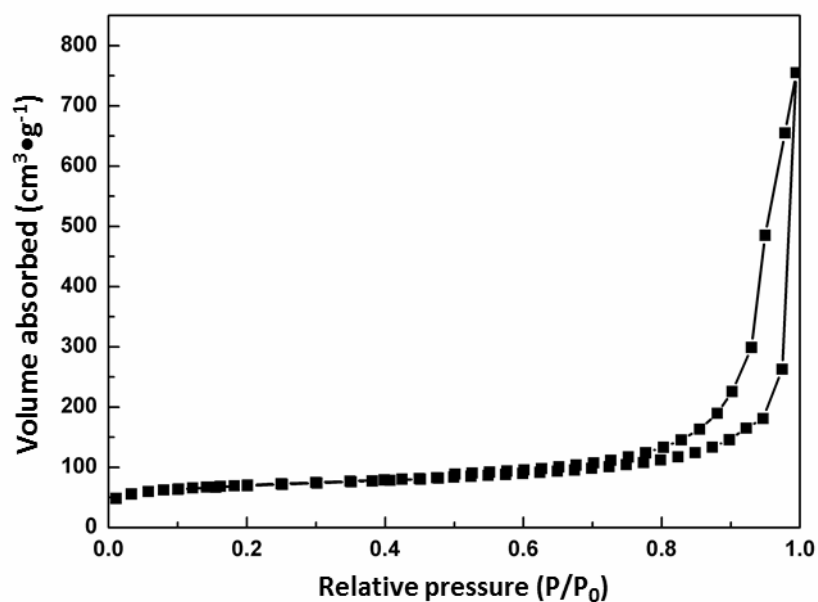

**Figure S2.** The nitrogen adsorption/desorption isotherms of 0.7% Na-ZnO hollow spheres.

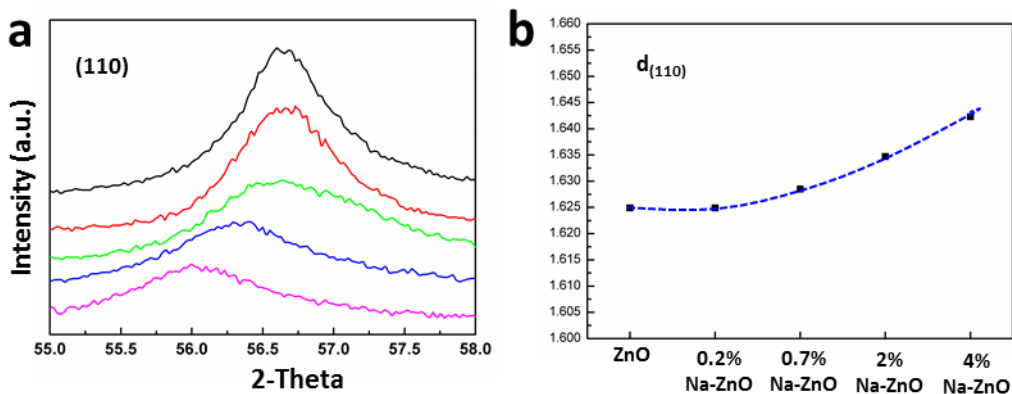

**Figure S3.** (a) was the enlarged view of the (110) peak shows a peak shift of Na doped ZnO and (b) showed the (110) lattice parameter change determined from positions of (110) peaks in (a). Reference patterns for wurtzite ZnO (PDF#36-1451).

The (110) lattice spacing was 1.6249, 1.6249, 1.6285, 1.6347, 1.6423 Å for ZnO with 0, 0.2%, 0.7%, 2%, 4% Na doped concentration.

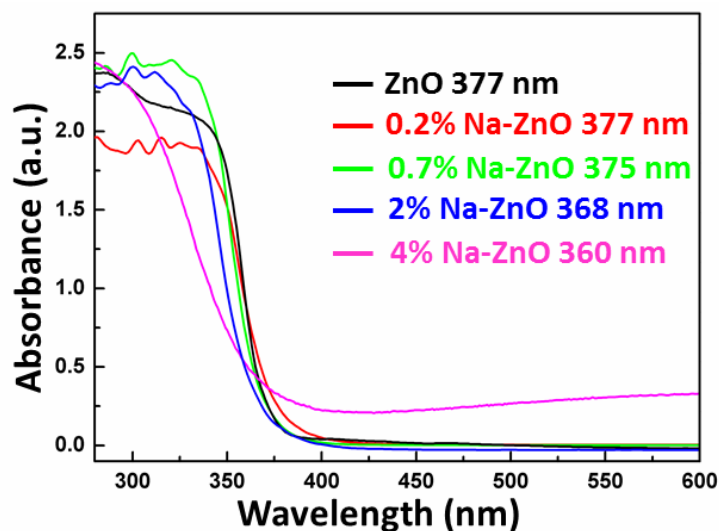

**Figure S4.** The UV adsorbance spectra (calculated from diffuse reflectance spectra) of the Na-ZnO hollow spheres with 0, 0.2, 0.7, 2 and 4 at% Na doping concentration.

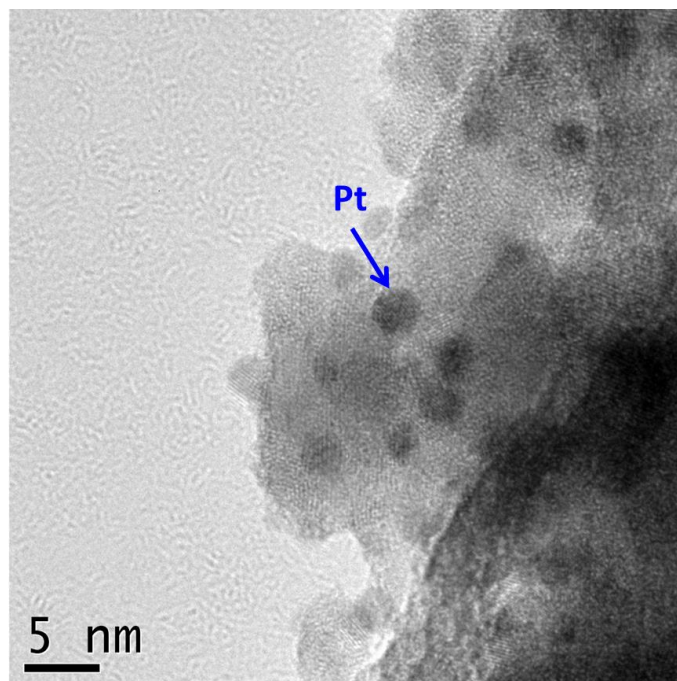

**Figure S5.** TEM image of 0.7% Na-ZnO/Pt hollow spheres.

The TEM image of the typical 0.7% Na-ZnO hollow spheres decorated with Pt nanoparticles. It recorded that the Pt nanoparticles were attached on the shells. We detected that the size of Pt nanoparticles was in 3 nm level.

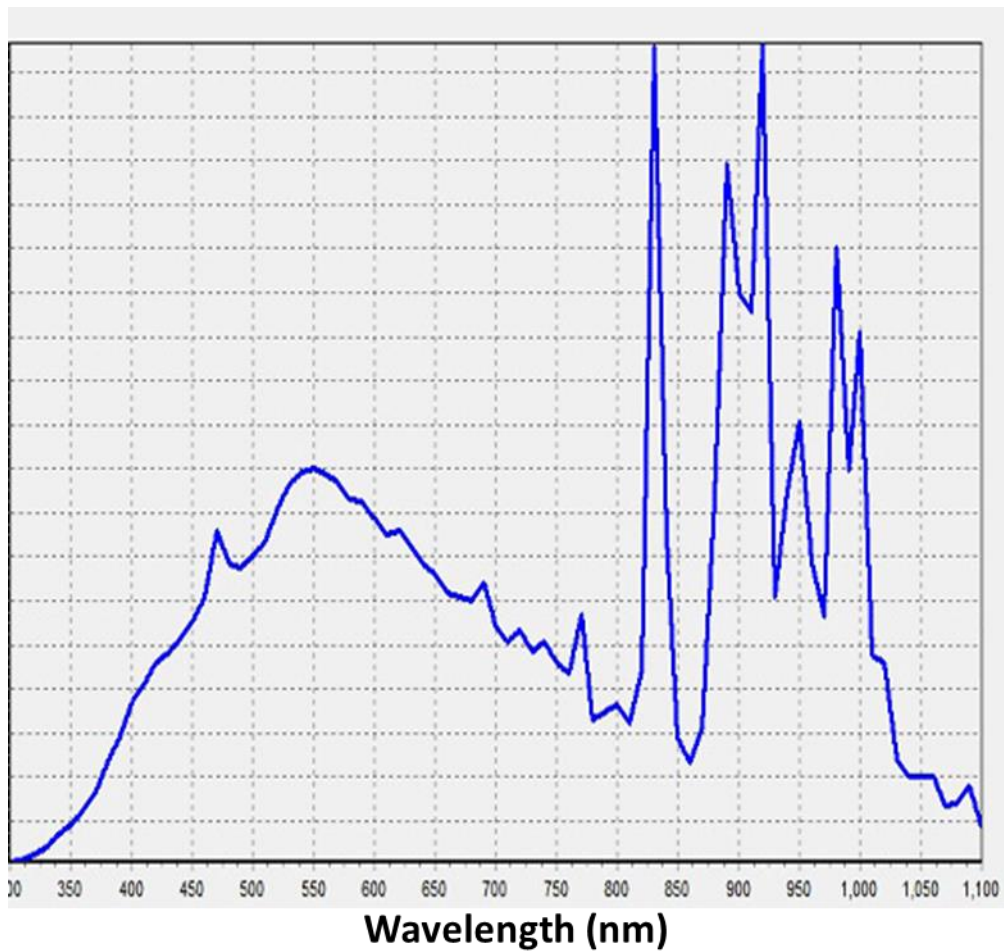

**Figure S6.** The energy distribution of our xenon lamp provided by manufacturers.
